1 High innate preference for black substrate in the chive gnat, *Bradysia odoriphaga* (Diptera:  
2 Sciaridae)

3  
4 Lina An<sup>1</sup>, Fan Fan<sup>1</sup>, Klaus Lunau<sup>2</sup>, Mengyao Li<sup>1</sup>, Xiaofan Yang<sup>1</sup>, Guoshu Wei<sup>1</sup>

5  
6 <sup>1</sup>College of Plant Protection, Hebei Agricultural University, Baoding (China)

7 <sup>2</sup>Institute of Sensory Ecology, Biology Department, Heinrich-Heine-University Düsseldorf  
8 (Germany)

9

10

11

12

13

14 Corresponding author:

15 Prof. Dr. Guoshu Wei

16 College of Plant Protection

17 Hebei Agricultural University

18 e-mail: weiguoshu03@aliyun.com

19

20 Running title: *Bradysia odoriphaga* prefers black substrate

21 Summary statement: Chive gnat (*Bradysia odoriphaga*) innately prefer to move to black  
22 substrate irrespective of colour hues and brightness. This behaviour maintained the ambient  
23 lights change.

24

25

26

27

28 **High innate preference for black substrate in the chive gnat, *Bradysia odoriphaga***  
29 **(Diptera: Sciaridae)**

30 **Summary**

31 The chive gnat, *Bradysia odoriphaga*, is a notorious pest of *Allium* species in China. Colour trapping is an  
32 established method for monitoring and controlling of *Bradysia* species. In order to clarify the effect of  
33 colour preference of *B. odoriphaga* for the egg-laying substrate, multiple-choice tests were employed to  
34 assess the spontaneous response of the chive gnat to different colour hues and brightness levels under  
35 different intensities of white illumination and two spectrally different illuminations. Given the choice  
36 among four colours differing in hue under different intensities of white illumination and two spectrally  
37 different illuminations, chive gnat adults visited preferably the black substrate, a lesser extent to brown and  
38 green substrates, and the least extent to orange substrate irrespective of illumination. Given the choice  
39 among four levels of brightness under the same illumination conditions as those in the previous experiment  
40 (different intensities of white illumination and two spectrally different illuminations), chive gnats preferred  
41 black substrate over dark grey, and these over light grey and white substrates. Meanwhile, both virgin and  
42 copulated adults significantly preferred black over other colour hues and brightness. Based on our results,  
43 we conclude that the chive gnat adults significantly prefer black substrates irrespective of colour hues and  
44 brightness. This behaviour does not alter due to ambient light condition changes. No difference observed  
45 between choices of female and male adults. Our results provide new insight for understanding the colour  
46 choice behaviour in chive gnat and pave a way to improve monitoring and control of chive gnats and  
47 management.

48  
49 *Key words:* *Bradysia odoriphaga*, chive gnat, colour preference, black substrate, hue, brightness, colour  
50 trapping.

51 **Introduction**

52 The chive gnat, *Bradysia odoriphaga* (Diptera: Sciaridae), is the most destructive pest to *Allium* vegetables  
53 in China, especially to Chinese chive *Allium tuberosum*. Although chive gnat adults do not cause plant  
54 damage, the females lay eggs around the root in soil, hatch into larvae that directly damage roots and bulbs  
55 of plants, thus disrupting the uptake of water and nutrients (Mei et al., 2003). Historically, the control of  
56 chive gnat has been dependent on the use of chemicals, such as chlorpyrifos and phoxim (Gao et al., 2000;  
57 Mu et al., 2005), but it didn't turn out well mainly due to the cryptic larval life style and the development  
58 of resistance to insecticides (Zhang et al., 2003). Particularly, excessive use of certain pesticides will lead  
59 to environmental pollution and high pesticide residues. Therefore, it's necessary and exigent to search safe  
60 and efficient management strategies to control chive gnat.

61 Many insects use visual stimuli to perceive a variety of resources, such as adult food, mating encounter  
62 sites, oviposition sites or shelter from harmful biotic or abiotic conditions (Labeyrie, 1978; Southwood,  
63 1973). The quality of the perception of visual objects, however, is strongly influenced by the  
64 characteristics of reflected light including hue and brightness. Colour is especially important for  
65 distinguishing resource quality, e.g. flower condition, partner selection (von Frisch 1914; Kelber 2006; An  
66 et al., 2018; Koethe et al., 2018), as well as location (e.g. oviposition site, shelter) (Osorio and Vorobyev,  
67 2008; Collins and Blackwell, 2000). In this study we investigated the preference of chive gnat for colour  
68 and brightness of chive gnat in order to reduce the damage of *A. tuberosum* by means of monitoring or

69 controlling the chive gnat.

70 Vision-orientated coloured sticky traps may represent relevant potential monitoring and control strategies  
71 of *Bradysia* species (Cloyd et al., 2007), since these trapping methods are environment-friendly and do not  
72 cause pesticide residues and pesticide resistance. Colour trapping is a common method for trapping various  
73 insect species (Gao et al., 2016). Many insects have already been confirmed to exhibit colour preferences  
74 including those for distinct colour hues, colour saturation, colour brightness, and colour contrast (Lunau  
75 and Maier, 1995; Chittka and Menzel, 1992; but see Kelber, 2005). Most profound studies about innate  
76 colour preferences in insects focus on pollinating insects such as bees (Lunau et al., 1996; Hempel de  
77 Ibarra et al., 2000; Koethe et al., 2018), lepidopterans (Weiss, 1997; Goyret et al., 2008), and flies (Ilse,  
78 1949; An et al. 2018; Lunau et al., 2018), whereas studies about colour preferences in agricultural pests  
79 mostly evaluate the results of colour trapping (Bian et al., 2016; Silva et al., 2018). Colour trapping is a  
80 common method for the control of dipteran pest species. For example, the whitefly, *Bemisia tabaci*, some  
81 tephritid flies, and anthomyid flies, *Strobilomyia* spp. are particularly attracted by yellow sticky traps (Hill  
82 and Hooper, 2011; Jenkins and Roques 1993; Hou et al., 2006), whereas fungus gnat, *Bradysia difformis*,  
83 exhibit an innate colour preference for black (Stukenberg et al., 2018). Actually, in field experiments with  
84 coloured sticky traps chive gnat have already been successfully captured (Hong, 2016), but the quantitative  
85 analysis of the contribution of colour parameters such as hue and brightness to lure chive gnats has never  
86 been concerned so far.

87 The purpose of our experiments was to determine the relative attractiveness of different colours to adult  
88 chive gnats and to assess the efficacy of colour parameters, hue and brightness, to attract chive gnats. In  
89 addition we investigated whether the chive gnat adults maintained their innate colour preference when the  
90 colour stimuli were presented under various light intensities of white illumination and two spectrally  
91 different illuminations. The outcome of these experiments will lead to a better understanding of their  
92 colour choice behaviour and colour vision and is thereby beneficial to understand their biological  
93 characteristics and develop specific monitoring tools and efficient control strategies.

## 94 Material and methods

95 **Chive gnat rearing and handling:** *B. odoriphaga* larvae were initially obtained from a field of *Allium*  
96 *tuberosum* in Cangzhou Hebei Province, China during May 2018. The colonies of *B. odoriphaga* were  
97 maintained in the IPM Laboratory of Hebei Agricultural University and reared on *A. tuberosum* for more  
98 than 6 generations. Eggs, larvae and pupae were reared in Petri dishes (9cm in diameter, 2.5cm height)  
99 containing a filter paper that was soaked with 2.5% agar medium, and the fresh chive *A. tuberosum* was  
100 placed in a separate petri dish as diet for the larvae. The chive gnats were placed in rearing containers  
101 made of plastic pots (9cm top diameter, 15cm bottom diameter, 5cm height). A petri dish (15cm diameter)  
102 was used as the bottom of each rearing container, and a reversed plastic cup (9cm top diameter, 15cm  
103 bottom diameter, 5cm height; with dozens of needle holes for gas exchange) was used as the cover. The  
104 container between the bottom and the cover was sealed with sealing film. Each petri dish contained a filter  
105 paper that was soaked with 2.5% agar medium (about 15ml) for maintaining moisture. Newly emerged  
106 female and male gnats could mate immediately. Female gnats can lay eggs one or two days after mating.  
107 Insect colonies were maintained in climate chambers maintained at 24±1°C with 75±5% relative humidity  
108 and a 14:10 hours light: dark cycle.

109

110 **Colour hue and brightness:** Based on the colours of chive gnats` body surface, of the fresh and old host

111 plants, and of the soil green, orange, brown, and black colour papers were selected as stimuli for the  
112 experiment with varying colour hues. Four brightness levels including white, light grey, dark grey, and  
113 black and two blue colour stimuli differing in brightness were selected for the experiment with varying  
114 colour brightness. Colour papers made of photographic paper printed via POWERPOINT printed by a  
115 colour inkjet printer (HP 100) were offered (Table 1). The spectral reflectance of the colour stimuli was  
116 measured by a spectrophotometer (Konica Minolta CM-3700A, Japan) (Fig. 1). Light emitting diodes used  
117 in our experiment were designed specific ranges of wavelengths, such as that of green light from 525 to  
118 530nm, of blue light from 455 to 460nm and white light with a colour temperature of 6000~6500K. All  
119 intensities of LEDs were measured by illuminometer (TES-I339, Tes Electronics Industry Corporation,  
120 China)

121

122 **Experimental device:** The device for multiple choice tests is a quadrilateral cube (length×width×  
123 height=30×30×30 cm) made out of cardboards and has four chambers of identical size. In the middle of  
124 the device is the release zone displaying a white colour (length×width=8×8 cm) of flies to be tested (Fig.  
125 2). Each chamber contained an artificial Chinese chive which was placed in the middle of the chambers`  
126 bottom. The device has a lid made of Plexiglas, which was used to prevent chive gnat adults from flying  
127 out of the device (Fig. 2).

128

129

### Experimental procedure

130 Based on the activity characteristics of chive gnat adults (Hong et al., 2017), all the experiments were  
131 started at 9:00 am every day. The experimental conditions simulated those of greenhouses used for  
132 growing Chinese chive. Before the tests the chive gnat adults were placed in a completely dark  
133 environment for 30 min for equal adaptation. In the experiments of innate preference for colour hues and  
134 brightness levels, each chamber was pasted with one of four coloured papers to be used as a colour  
135 chamber for quadruple choice.

136

#### Experiment 1: Colour hue and brightness preference under four intensities of white illumination

138 The rationale of the experiments was to study the innate preference of chive gnat adults to respond  
139 different colour hues and brightness of stimuli, respectively. Four colours differing in hues, black, orange,  
140 brown and green, were used to test the colour preference of chive gnats for four different intensities of  
141 ambient light. In addition, four brightness levels of stimuli, white, light grey, dark grey and black, were  
142 used to test the brightness preference of chive gnat for four different intensities of ambient light. For each  
143 trial 30 newly emerged, healthy adults were put into the release zone of the device under white light with  
144 0.1, 100, 1000, 10000lux, respectively. And the device was immediately covered with a transparent lid.  
145 After 30min the number of flies in each chamber was counted. Each treatment was repeated 20 times. Ten  
146 trials were performed with females and 10 trials were performed with males.

147

#### Experiment 2: Colour and brightness discrimination under two spectrally different illuminations

149 The rationale of the experiments was to study whether chive gnat adults can maintain the colour preference  
150 when tested under spectrally different illuminations. The same colour stimuli, four colour hues and four  
151 brightness, were respective used to test the colour choice of chive gnats under blue or green illumination  
152 with 250lux. For each trial 30 newly emerged, healthy adults were put into the release zone of the device  
153 under blue and green light with 500lux, respectively. And the device was immediately covered with a  
154 transparent lid. After 30min the number of flies in each chamber was counted. Each treatment was repeated

155 20 times. Ten trials were performed with females and 10 trials were performed with males.

### 156 **Experiment 3: Colour hues and brightness of chive gnat adults with different physiological state**

157 The rationale of the experiments was to study the innate preference of virgin and copulated adults to  
158 respond different colour hues and brightness of stimuli, respectively. For each trial, virgin adults and  
159 copulated adults were put into the release zone of the device under white light with 100lux, respectively.  
160 And the device was immediately covered with a transparent lid. After 30min the number of flies in each  
161 chamber was counted. Each treatment was repeated 20 times. Ten trials were performed with females and  
162 10 trials were performed with males.

163

164

## Results

### 165 **Experiment 1: Colour and brightness preference under four intensities of white illumination**

166 In the colour preference experiments the adults significantly preferred the black colour irrespective of light  
167 intensities while other colours, i.e. green, brown and orange, were less attractive (Fig. 3). The preference  
168 for black increased with the intensities of light increased, except for the test with 1000lux intensity. They  
169 visited the black with a choice frequency of 40.26% for 0.1lux, 47.54% for 100lux, 45.37% for 1000lux  
170 and 49.66% for 10000lux intensity, respectively. The brown and green colours were significantly less  
171 attractive. The orange colour was seemingly the least attractive with a choice frequency of 13.84% for  
172 0.1lux intensity, 11.19% for 100lux intensity, 11.61% for 1000lux intensity and 14.78% for 10000lux  
173 intensity, respectively.

174 In the brightness choice experiments the adults also significantly preferred the black colour irrespective of  
175 light intensities, while other brightness levels were less attractive (Fig. 4). They visited the black with a  
176 choice frequency of 36.73% for 0.1lux, 48.72% for 100lux, 44.39% for 1000lux and 49.75% for 10000lux  
177 intensity, respectively. The choice frequency for dark grey was 28.47%, 23.65%, 26.01% and 30.52%,  
178 respectively. The light grey and white colour were less attractive. The chive gnats visited the light grey and  
179 white with a choice frequency of 20.12% (light grey) and 14.67% (white colour) for 0.1lux; 16.11% (light  
180 grey) and 11.56% (white colour) for 100lux; 19.06% (light grey) and 10.54% (white colour) for 1000lux  
181 and 11.23% (light grey) and 8.5% (white colour) for 10000lux intensity. The control experiment using the  
182 device with the same colour (white colour) in each chamber under 100 lux white illumination showed that  
183 chive gnats did not prefer one of the chambers (supplement S1). The colour preference was similar for  
184 males and females (Table 2).

185

### 186 **Experiment 2: Colour and brightness discrimination under two spectrally different illuminations**

187 Given the multiple choice among four colours differing in hues, black, blue, brown and orange, with blue  
188 light of 500lux intensity, the choice frequency of chive gnats for black was 42.77%, which was  
189 significantly higher than those for blue, brown and orange colours (19.67%, 22.09% and 15.47%). A  
190 similar result was obtained testing the chive gnats in green light of 500lux  
191 intensity; 44.45% of the adults significantly preferred the black than other three colours with a choice  
192 frequency of 16.83%, 25.49% and 13.22%, respectively (Fig. 5A).

193 Moreover, the multiple choice among four levels of brightness, black, dark grey, light grey and white,  
194 under blue light of 500lux intensity were used for testing the choice preference of the chive gnat adults.  
195 The adult chive gnats significantly preferred black with a percentage of choice amounting to 43.16% over  
196 dark grey amounting to 25.55% as well as light grey and white amounting to 18.88% and 12.41%,  
197 respectively. Also under green light of 500lux intensity the chive gnat adults significantly preferred black

198 with a choice frequency amounting to 45.73% over dark grey, light grey and white amounting to 25.64%,  
199 18.23% and 10.40%, respectively (Fig. 5B).

### 200 **Experiment 3: Colour hues and brightness of chive gnat adults with different physiological state**

201 In the colour choice experiments both the virgin and copulated adults significantly preferred the black  
202 colour, to a lesser visited brown and green, whereas orange was significantly less attractive (Fig. 6). By  
203 contrast, in the brightness experiment, both the virgin and copulated adults significantly preferred the black  
204 colour over dark grey, and those over light grey and white (Fig. 6).

205 In all experiments there was no significant difference in colour choice behaviour between female and male  
206 in chive gnat, and also no significant differences in colour preference between virgin and copulated adults  
207 were found (Table 2).

208

209

## Discussion

210 Adult chive gnats, *Bradysia odoriphaga*, showed a significant preference for the black substrate, while  
211 other coloured substrates attracted only a limited number of chive gnat. These results provide strong  
212 evidence that chive gnats possess an innate colour preference for black substrates and some evidence that  
213 they maintain the preference for black even if the ambient light conditions change, i.e. the preference for  
214 black is not altered by intensity and spectral composition of the illuminating light. Although the tests were  
215 specifically designed to capture female chive gnats referring to the egg-laying sites, no differences in the  
216 colour preference between the virgin and copulated adults of *B. odoriphaga* were found and there were no  
217 differences in the colour preference between female and male. We, therefore, speculated chive gnat adults  
218 prefer black substrate not only for searching oviposition sites, but also for other reasons, such as searching  
219 for mates or finding a safe place for hiding in camouflage due to their black surface. Colour traps have  
220 been used to control *Bradysia* gnats under field conditions (Ma et al., 2013; Hong, 2016), but innate colour  
221 preferences have never been investigated in detail for chive gnats, *B. odoriphaga*.

222 Wavelength-specific behaviours known from specific tasks such as oviposition in butterflies (Lepidoptera)  
223 and flies (Diptera) regularly are dependent of intensity (Song and Lee, 2018). Gravid females of certain  
224 mosquitos, *Toxorhynchites moctezuma* and *T. amboinensis* (Collins and Blackwell, 2000), oviposited  
225 preferentially into black substrate. Remarkably, the flower-visiting hoverfly *Eristalis tenax* prefers yellow  
226 colours, can learn many other colours, but strongly avoids dark colours (An et al., 2018). The canopy ant,  
227 *Cephalotes atratus*, prefers bright white colours when given a choice of target colours of varying shades of  
228 grey; specifically brightness seems to have a great influence on the landing behavior of canopy ants, thus it  
229 is suspected that the high contrast between tree trunks and the darker surrounding foliage provides the  
230 preferred visual target for falling ant (Yanoviak and Dudley, 2006).

231 Likewise other dipteran pests are known to be attracted to black colours such as the bluebottle fly,  
232 *Calliphora vomitoria*, (Benelli et al., 2018) and the tabanid fly, *Tabanus illotus*, (Bracken et al., 1962). The  
233 preference for black surfaces found in water-living insects (Schwind, 1995) and tabanid flies (Horwarth et  
234 al., 2008) is associated with the perception of horizontally polarized light reflected from shiny surfaces  
235 such as water which is optimally seen at black targets (Horwarth et al., 2008). Since the target colours used  
236 in the colour choice tests with the chive gnat were not shiny and the light source was not the sun, it is very  
237 unlikely that polarization vision might have influenced the colour choice of the chive gnat.

238 The black surface was preferred by chive gnats in comparison to all other colours. One possible reason is  
239 that the chive gnats performed a colourblind choice relying only on the contrast between the black target  
240 and other colours and the background which is one of the key features for object perception of insects

241 (Prokopy and Owens, 1983) including Diptera (Lunau, 2014). A strong brightness contrast may be found in  
242 nature between light plant stems, leaves and the dark substrate. The finding that adult fungus gnats,  
243 *Bradysia difformis*, significantly preferred black sticky traps over yellow ones, was interpreted that fungus  
244 gnat adults were searching for a convenient egg-laying substrate (Stukenberg et al., 2018). Based on this  
245 hypothesis, the spectral reflectance of the host plant (*Allium tuberosum*) and soil substrate close to root of  
246 the chive gnat was measured (Fig. 7). The maximum value of spectral reflectance of leaves (*A. tuberosum*)  
247 is 38%, whereas the maximal reflectance of soil substrate is about 9%, which is very close to the value of  
248 the black colour in our experiments (black: 6%). As a conclusion, we assume that the strong colour  
249 contrast between the substrate for egg-laying and the host plant might guide the search for mating partners  
250 or oviposition sites in dim surroundings.  
251 Although habitat-related olfactory stimuli have been identified as important cues in the specific task of  
252 some insects (Riffell 2012; Clifford and Riffell 2013; Linley 1988, 1989), visual stimuli should not be  
253 overlooked as an important sensory modality, especially the aspect of searching and finding host plant  
254 (Reeves, 2011). In our study, we focused on the effect of visual stimuli for chive gnats, not olfactory  
255 stimuli, so a scentless artificial host plant was used as an attractive signal in order to avoid the odour  
256 interference of host plant. Further studies are needed to explore the interaction of visual and olfactory cues  
257 for oviposition and the visual mechanism underlying the colour choice in chive gnats, i.e. photoreceptor  
258 types, visual system and their visual ecological significance.

259

## References

- 260 An L. et al. 2018. The yellow specialist: Dronefly *Eristalis tenax* prefers different yellow colours for landing and proboscis  
261 extension. *Journal of Experimental Biology*, jeb.184788. Doi: 10.1242/jeb.184788.
- 262 Benelli G. et al. 2018. High innate attractiveness to black targets in the blue blowfly, *Calliphora vomitoria* (L.) (Diptera:  
263 Calliphoridae). *Acta Tropica* 182: 144-148.
- 264 Bian L. et al. 2016. Effect of trap colour, height, and orientation on the capture of yellow and stick tea thrips (Thysanoptera:  
265 Thripidae) and nontarget insects in tea gardens. *Journal of Economic Entomology* 109: 1241-1248.
- 266 Bracken G.K. et al. 1962. The orientation of horse flies and deer flies (Tabanidae: Diptera). II. The role of some visual  
267 factors in the attractiveness of decoy silhouettes. *Entomologia Experimentalis et Applicata* 40(5), 11. DOI:  
268 10.1139/z62-064.
- 269 Chittka L. and Menzel R. 1992. The evolutionary adaptation of flower colours and the insect pollinators' colour vision.  
270 *Journal of Comparative Physiology A* 171: 171-181.
- 271 Clifford M.R. and Riffell J.A. 2013. Mixture and odorant processing in the olfactory systems of insects: a comparative  
272 perspective. *Journal of Comparative Physiology A*. 199(11): 911-928.
- 273 Colyd R.A. et al. 2007. Phototaxis of fungus gnat, *Bradysia* sp. nr *coprophila* (Linter) (Diptera: Sciaridae), adults to different  
274 light intensities. *HortScience* 42: 1217-1220.
- 275 Collins L. E. and Blackwell A. 2000. Colour cues for oviposition behaviour in *Toxorhynchites moctezuma* and  
276 *Toxorhynchites amboinensis* mosquitoes. *Journal of Vector Ecology* 25(2): 127-135.
- 277 Gao Z. et al. 2000. Sensitivity of *Bradysia odoriphaga* in various places in Hebei province to some insecticides. *China*  
278 *Journal of Pest Science*. 4: 88-90.
- 279 Gao Y. et al. 2016. Trapping effect of three colour sticky traps on thrips in soybean fields. *China Journal of Oil Crop Science*  
280 6: 838-842.
- 281 Goyret J. et al. 2008. Why do *Manduca sexta* feed from white flowers? Innate and learnt colour preferences in a hawkmoth. -  
282 *Naturwissenschaften* 95: 569-576. Doi: 10.1007/s00114-008-0350-7.
- 283 Hempel de Ibarra N. et al. 2000. Detection of dim and bright colours by honeybees. *Journal of Experimental Biology* 203:

- 284 3289-3298.
- 285 Hill A.R. and Hooper G.H.S. 2011. Attractiveness of various colours to Australian tephritid fruit flies in the field.  
286 *Entomologia Experimentalis et Applicata* 35: 119-128.
- 287 Hou M. et al. 2006. Trap catches and control efficiency of *Bemisia tabaci* (Homoptera: Aleyrodidae) adults in greenhouse by  
288 yellow sticky traps. *Scientia Agricultural Sinica* 9: 1934-1939.
- 289 Hong D.W. et al. 2017. Comparison of the effects of methods for *Bradysia odoriphaga* (Diptera: Sciaridae) adult population  
290 monitoring. *Acta Phytophylacica Sinica* 44(5): 871-872.
- 291 Hong D.W. 2016. The effect of method analysis of the population of *Bradysia odoriphaga* Yang et Zhang adults (Diptera:  
292 Sciaridae). (Master dissertation, Hebei Agricultural University, Baoding, China).
- 293 Horvath G. et al. 2008. Ventral polarization vision in tabanids: horseflies and deerflies (Diptera: Tabanidae) are attracted to  
294 horizontally polarized light. *Naturwissenschaften* 95: 1093-1100
- 295 Ilse D. 1949. Colour discrimination in the dronefly, *Eristalis tenax*. *Nature* 163: 255-256.
- 296 Jenkins M.J. and Roques A. 1993. Attractiveness of Colour Traps to *Strobilomyia* spp. (Diptera: Anthomyiidae).  
297 *Environmental Entomology* 22: 297-304.
- 298 Kelber A. 2005. Alternative use of chromatic and achromatic cues in a hawkmoth. *Proceeding Biology Sciences* 272: 2143-  
299 2147.
- 300 Kelber A. 2006. Invertebrate colour vision. In: Warrant EJ, Nilsson D-E (eds) Invertebrate vision. Cambridge University  
301 Press, Cambridge, pp 250-290.
- 302 Koethe S. et al. 2018. Spectral purity, intensity and dominant wavelength: Disparate colour preferences of two Brazilian  
303 stingless bee species. *PLoS ONE* 13(9): e0204663.
- 304 Labeyrie, V. 1978. Reproduction of insects and coevolution of insects and plants. *Entomologia Experimentalis et Applicata*  
305 24:296-304.
- 306 Linley J.R. 1988. Laboratory experiments on factors affecting oviposition site selection in *Toxorhynchites amboinensis*  
307 (Diptera: Culicidae), with a report on the occurrence of egg cannibalism. *Medical & Veterinary Entomology* 2: 271-277.
- 308 Linley J.R. 1989. Laboratory tests of the effects of p-cresol and 4-methylcyclohexanol on oviposition by three species of  
309 *Toxorhynchites* mosquitoes. *Medical & Veterinary Entomology* 3: 347-352.
- 310 Lunau K. 2014. Visual ecology of flies with particular reference to colour vision and colour preferences. *Journal of*  
311 *Comparative Physiology A* 200: 497-512.
- 312 Lunau K. and Maier E.J. 1995. Innate colour preferences of flower visitors. *Journal of Comparative Physiology A* 177: 1-19.
- 313 Lunau K. et al. 1996. Colour choices of naive bumble bees and their implications for colour perception. *Journal of*  
314 *Comparative Physiology A* 178: 477-489.
- 315 Lunau K. et al. 2018. Limitations of learning in the proboscis reflex of the flower visiting syrphid fly *Eristalis tenax*. *PloS*  
316 *ONE* 13(3): e0194167.
- 317 Mu W. et al. 2005. Sublethal effects of eight insecticides on development and reproduction of *Bradysia odoriphaga*. *Acta*  
318 *Entomologica Sinica* 48(1): 147-150.
- 319 Ma X. et al. 2013. Study on trapping and killing technology of the chive gnat *Bradysia odoriphaga* adults. *China Plant*  
320 *Protection* 12: 33-36. Doi: 10.3969/j.issn.1672-6820.2013.12.008
- 321 Mei Z. et al. 2003. The biology, ecology and management of *Bradysia odoriphaga*. *Entomological Knowledge* 40(5): 396-  
322 398.
- 323 Osorio D. and Vorobyev M. 2008. A review of the evolution of animal colour vision and visual communication signals.  
324 *Vision Research* 48: 2042-2051.
- 325 Prokopy R.J. and Owens E.D. 1983. Visual detection of plants by herbivorous insects. *Annual Review of Entomology* 28(1):  
326 337-364.
- 327 Reeves J.L. 2011. Vision should not be overlooked as an important sensory modality for finding host plants. *Environmental*



- 328 *Entomology* 40(4): 855-863.
- 329 Riffell J.A. 2012. Olfactory ecology and the processing of complex mixtures. *Current Opinion in Neurobiology* 22(2): 236-  
330 242.
- 331 Schwind R. 1995. Spectral regions in which aquatic insects see reflected polarized light. *Journal of Comparative Physiology*  
332 *A* 177: 439-448.
- 333 Silva D. et al. 2018. Comparison of trap Types, placement, and colours for monitoring *Anthonomus musculus* (Coleoptera:  
334 Curculionidae) adults in highbush blueberries. *Journal of Insect Science* 18: 19.
- 335 Song B.M. and Lee C.H. 2018. Toward a mechanistic understanding of colour vision in insects. *Frontier in Neural Circuits*  
336 12: 16.
- 337 Southwood T.R.E. 1973. The insect/plant relationship an evolutionary perspective. In *Insect Plant Relationships*, ed. H. F.  
338 van Emden, pp. 3-30. London: Blackwell.
- 339 Stukenberg N. et al. 2018. Visual orientation of the black fungus gnat, *Bradysia difformis*, explored using LEDs.  
340 *Entomologia Experimentalis et Applicata* 166: 113-123.
- 341 Von Frisch K. 1914. Der Farbensinn und Formensinn der Biene. *Zool Jahrb Abt Allg Zool Physiol Tiere* 35:1-88.
- 342 Weiss M.R. 1997. Innate colour preference and flexible colour learning in the pipevine swallowtail. *Animal Behaviour* 53:  
343 1043-1052.
- 344 Yanoviak S.P. and Dudley R. 2006. The role of visual cues in directed aerial descent of *Cephalotes atratus* workers  
345 (Hymenoptera: Formicidae). *Journal of Experimental Biology* 209: 1777-1783.
- 346 Zhang A.J. et al. 2003. The effect of several pesticides of low toxicity on leek maggot. *Plant Protection*. 4: 48-49.  
347  
348

349

## Legends

350

351 Fig. 1 Reflectance spectra of all colour stimuli used in the experiments. L-grey means light grey, D-grey means dark grey, L-  
352 blue means light blue, D-grey means dark grey.

353 Fig. 2 Device of the colour choice tests with *Bradysia odoriphaga*. Scheme of the device of colour choice test, which was  
354 designed as a cube (edge length=30cm). In the middle of cube was small square (edge length=8cm) used as a decision area.  
355 The chambers were separated by cardboard. All four differently coloured chambers contained a mimic chive plant.  
356

357 Fig. 3 Colour choices in chive gnat *Bradysia odoriphaga* adults of different colour hues under four different intensity of white  
358 illumination. Different letters refer to significant differences according to One-way ANOVA with  $P < 0.05$ .

359

360 Fig. 4 Colour choices of stimuli varying in brightness in chive gnat *Bradysia odoriphaga* adults under four different  
361 intensities of white illumination. Different letters refer to significant differences according to One-way ANOVA with  
362  $P < 0.05$ .

363 Fig. 5 Colour and brightness preference of chive gnat *Bradysia odoriphaga* adults under two spectrally different  
364 illuminations. (A) Colour choice among four colour stimuli differing in hue under blue light (left) and green light (right). (B)  
365 Choice among four colour stimuli differing in brightness under blue light (left) and green light (right). Different letters refer  
366 to significant differences according to One-way ANOVA with  $P < 0.05$ .

367

368 Fig. 6 Colour and brightness preference of chive gnat *Bradysia odoriphaga* adults with different physiological states  
369 Different letters refer to significant differences according to One-way ANOVA with  $P < 0.05$ .

370

371 Fig. 7 Reflectance spectra of living environment in chive gnat *Bradysia odoriphaga*. Dashed boxes with yellow colour  
372 represent the measure sites of leaves of *A. tuberosum*. Dashed boxes with red colour represent the measure sites of soils  
373 around *A. tuberosum*.

374

Table 1 The RGB values of the different colour hues and brightness levels.

| Experiment        | Colour stimuli | RGB value     |
|-------------------|----------------|---------------|
| Colour hues       | Black          | 0, 0, 0       |
|                   | Brown          | 120, 60, 0    |
|                   | Green          | 0, 145, 65    |
|                   | Orange         | 245, 140, 0   |
| Brightness levels | Black          | 0, 0, 0       |
|                   | White          | 255, 255, 255 |
|                   | L-grey         | 190, 190, 190 |
|                   | D-grey         | 90, 90, 90    |

375

376 Table 2 Variance analysis of the response of *Bradysia odoriphaga* to colour hues and brightness under different light  
377 intensities and wavelengths

| Experiment | Influencing factors | df | Mean square | F | Sig. |
|------------|---------------------|----|-------------|---|------|
|------------|---------------------|----|-------------|---|------|

|                                           |                                         |   |            |           |       |
|-------------------------------------------|-----------------------------------------|---|------------|-----------|-------|
| exp.1<br>Colour hues<br>and<br>Brightness | Colour hues                             | 3 | 4928.634   | 237.479   | 0.000 |
|                                           | Sex                                     | 1 | 4.167E-006 | 0.000     | 1.000 |
|                                           | Light intensity                         | 3 | 2.639E-005 | 0.000     | 1.000 |
|                                           | Colour hues * Light intensity           | 9 | 96.965     | 4.672     | 0.000 |
|                                           | Colour hues * Sex                       | 3 | 14.646     | 0.706     | 0.552 |
|                                           | Light intensity * Sex                   | 3 | 4.167E-006 | 0.000     | 1.000 |
|                                           | Colour hues * Light intensity * Sex     | 9 | 41.156     | 1.983     | 0.056 |
|                                           | Brightness                              | 3 | 5003.351   | 243.417   | 0.000 |
|                                           | Sex                                     | 1 | 5.104E-005 | 0.000     | 0.999 |
|                                           | Light intensity                         | 3 | 2.326E-005 | 0.000     | 1.000 |
|                                           | Brightness * Light intensity            | 9 | 131.531    | 6.399     | 0.000 |
|                                           | Brightness * Sex                        | 3 | 66.062     | 3.214     | 0.029 |
|                                           | Light intensity * Sex                   | 3 | 2.326E-005 | 0.000     | 1.000 |
|                                           | Brightness * Light intensity * Sex      | 9 | 10.308     | 0.502     | 0.868 |
| exp.2<br>Colour hues<br>and<br>Brightness | Colour hues                             | 3 | 2176.384   | 22.634    | 0.000 |
|                                           | Sex                                     | 1 | 2.083E-006 | 0.000     | 1.000 |
|                                           | Wavelength                              | 1 | 2.083E-006 | 0.000     | 1.000 |
|                                           | Colour hues * Sex                       | 3 | 160.182    | 1.666     | 0.194 |
|                                           | Colour hues * Wavelength                | 3 | 26.082     | 0.271     | 0.846 |
|                                           | Wavelength * Sex                        | 1 | 2.083E-006 | 0.000     | 1.000 |
|                                           | Colour hues * Sex * Wavelength          | 3 | 98.290     | 1.022     | 0.396 |
|                                           | Brightness                              | 3 | 2449.824   | 41.924    | 0.000 |
|                                           | Sex                                     | 1 | 8.333E-006 | 0.000     | 1.000 |
|                                           | Wavelength                              | 1 | 8.333E-006 | 0.000     | 1.000 |
|                                           | Brightness * Sex                        | 3 | 58.165     | 0.996     | 0.407 |
|                                           | Brightness * Wavelength                 | 3 | 17.611     | 0.302     | 0.824 |
|                                           | Wavelength * Sex                        | 1 | 0.000      | 0.000     | 1.000 |
|                                           | Brightness * Sex * Wavelength           | 3 | 1.748      | 0.030     | 0.993 |
| exp.3<br>Colour hues<br>and<br>Brightness | Colour hues                             | 3 | 97182.366  | 22111.831 | 0.000 |
|                                           | Sex                                     | 1 | 25.843     | 5.880     | 0.508 |
|                                           | Physiological state                     | 1 | 0.689      | 0.157     | 0.692 |
|                                           | Colour hues * Sex                       | 3 | 145.064    | 33.006    | 0.000 |
|                                           | Colour hues * Physiological state       | 3 | 26.087     | 5.936     | 0.001 |
|                                           | Physiological state * Sex               | 1 | 0.707      | 0.161     | 0.688 |
|                                           | Colour hues * Sex * Physiological state | 3 | 29.337     | 6.675     | 0.000 |

|  |                                        |   |           |           |       |
|--|----------------------------------------|---|-----------|-----------|-------|
|  | Brightness                             | 3 | 97746.048 | 28301.236 | 0.000 |
|  | Sex                                    | 1 | 0.265     | 0.077     | 0.782 |
|  | Physiological state                    | 1 | 8.887     | 2.573     | 0.109 |
|  | Brightness * Sex                       | 3 | 190.087   | 55.038    | 0.000 |
|  | Brightness * Physiological state       | 3 | 250.019   | 72.390    | 0.000 |
|  | Physiological state * Sex              | 1 | 32.972    | 9.547     | 0.002 |
|  | Brightness * Sex * Physiological state | 3 | 149.622   | 43.321    | 0.000 |

378 Note: All the data were analyzed by Multifactor Variance Analysis (SPSS 17.0)

379

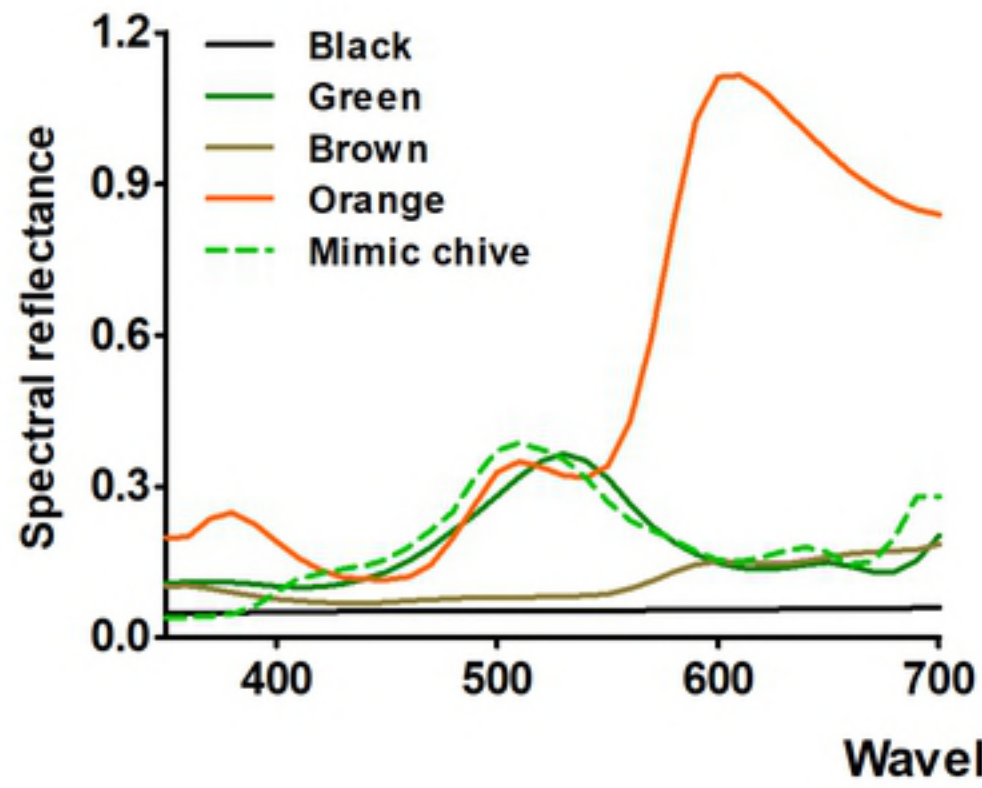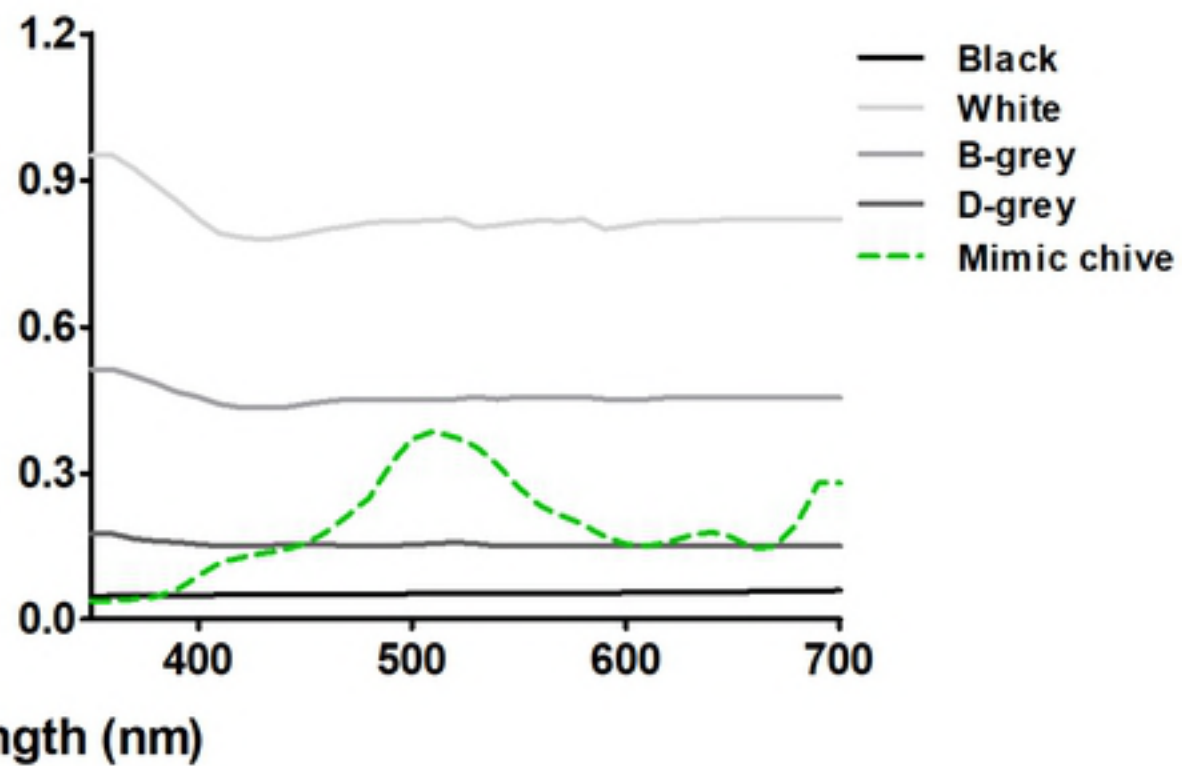

Fig. 1

bioRxiv preprint doi: <https://doi.org/10.1101/511121>; this version posted January 3, 2019. The copyright holder for this preprint (which was not certified by peer review) is the author/funder, who has granted bioRxiv a license to display the preprint in perpetuity. It is made available under aCC-BY 4.0 International license.

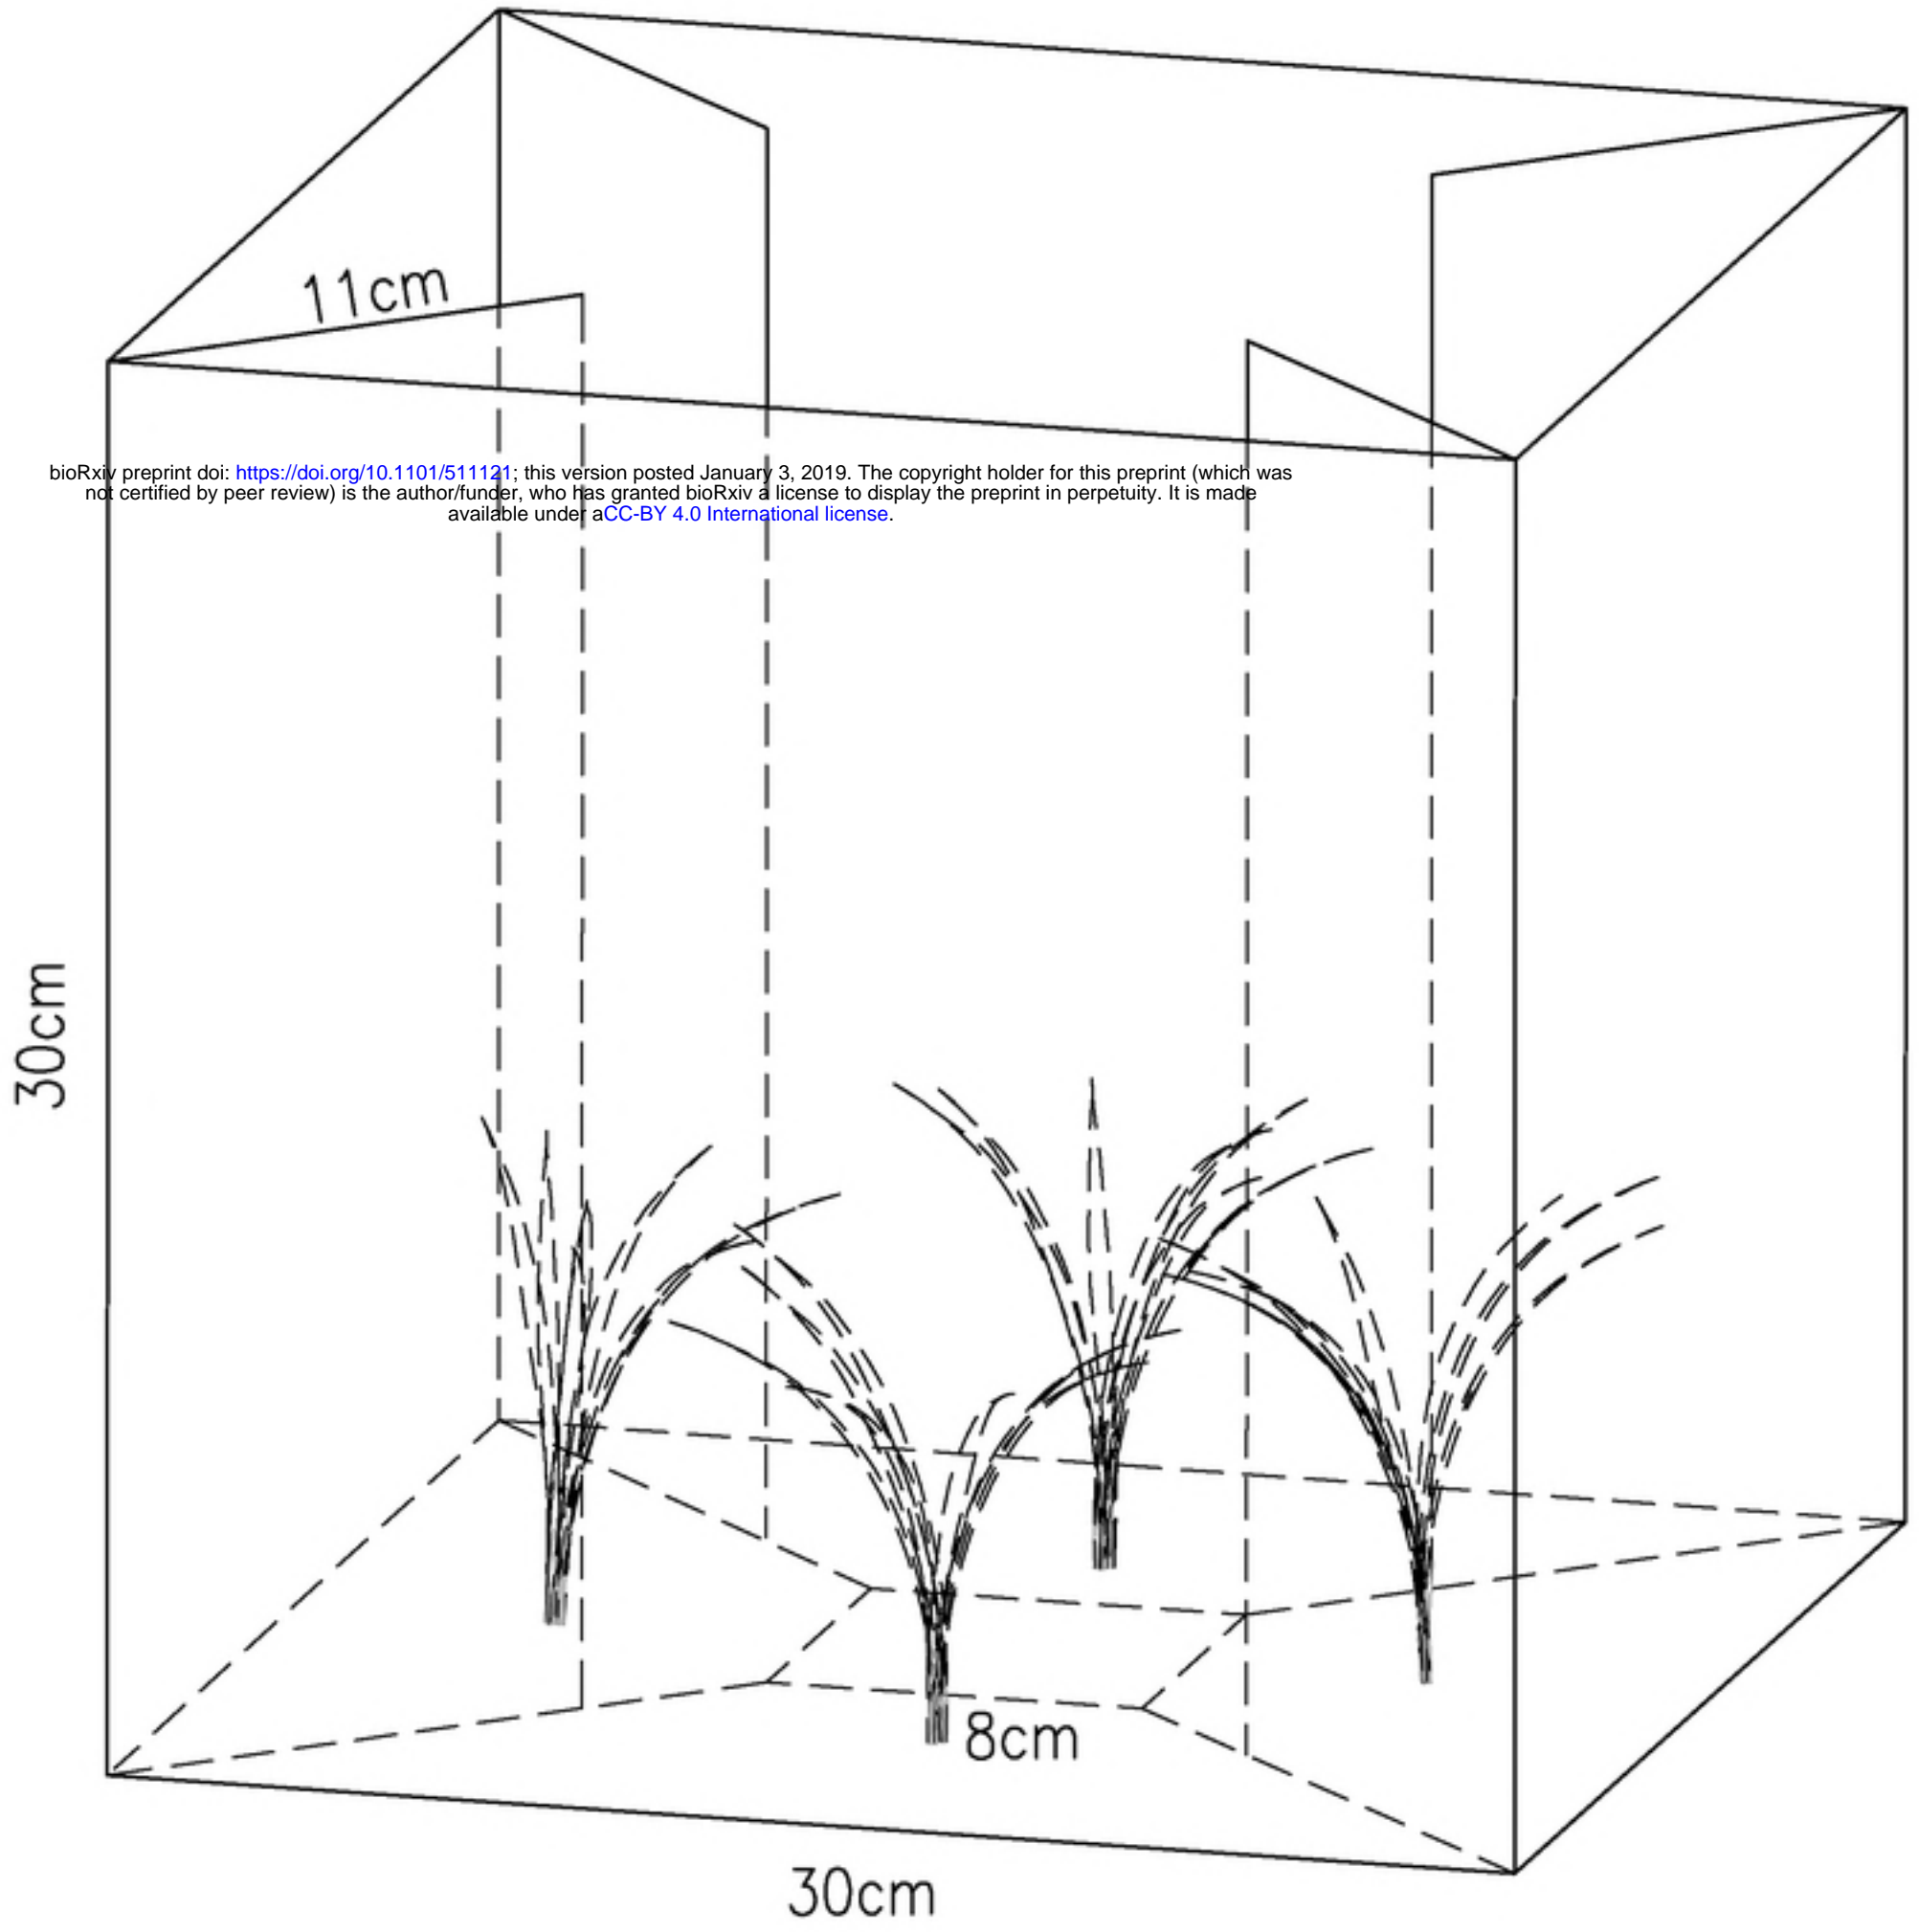

Fig.2

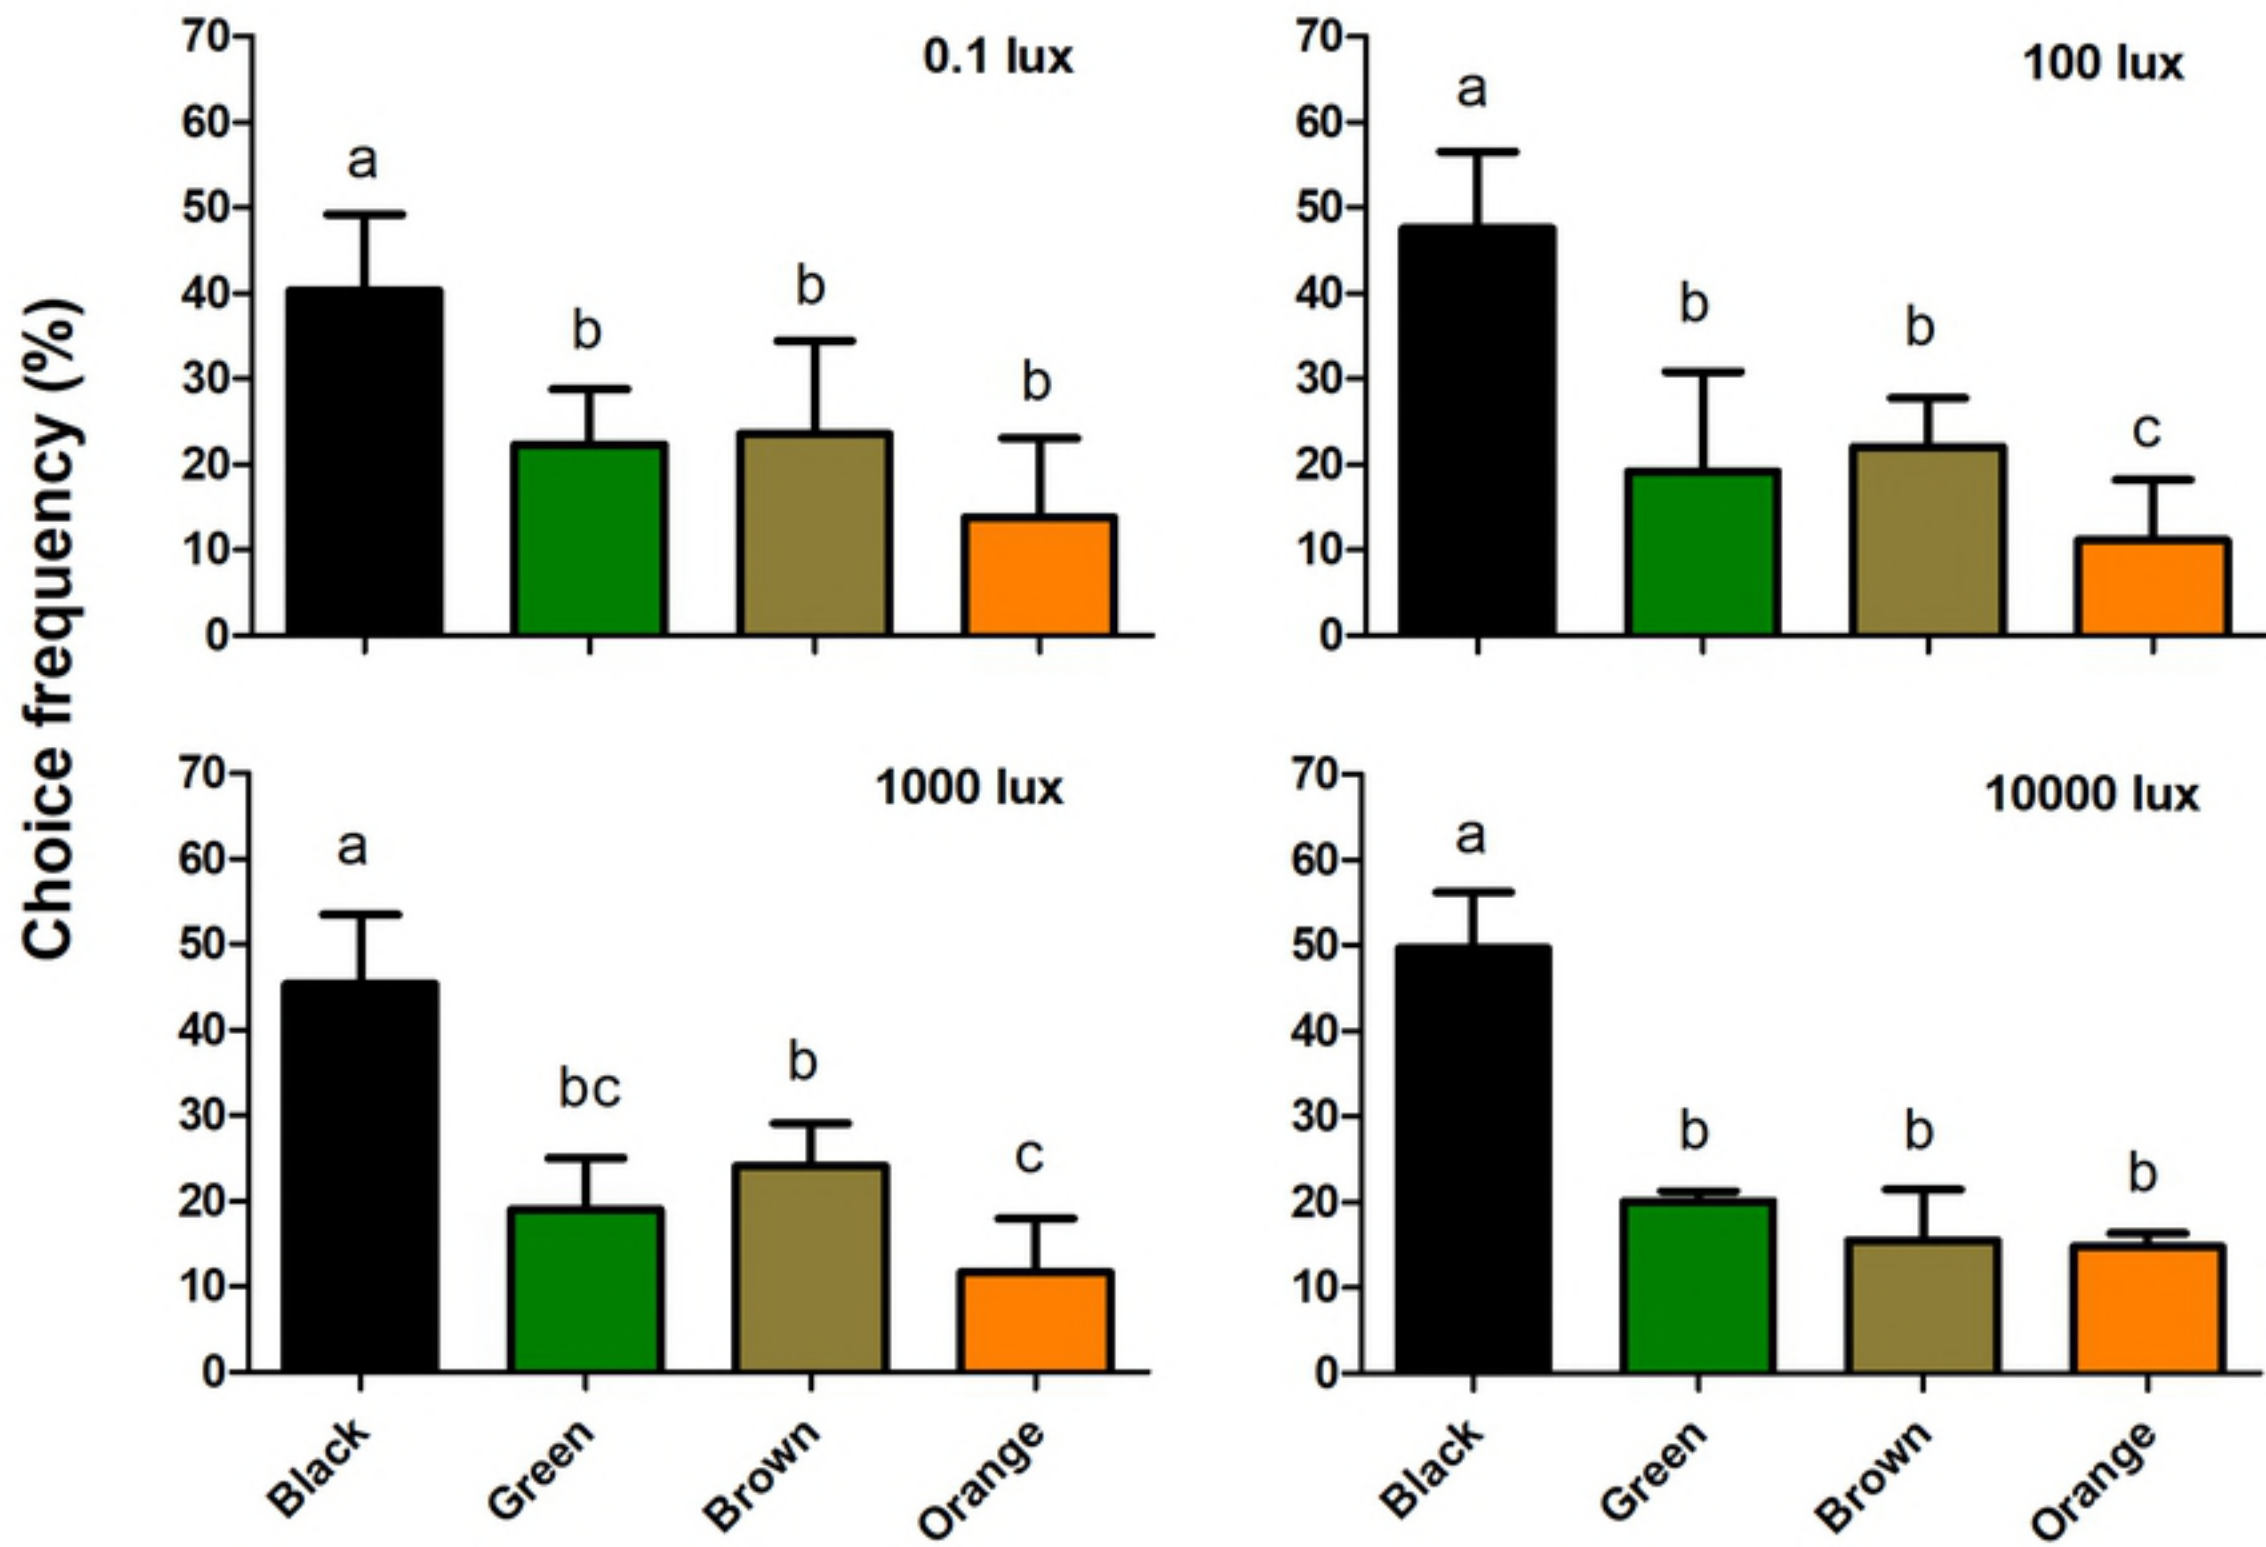

Fig. 3

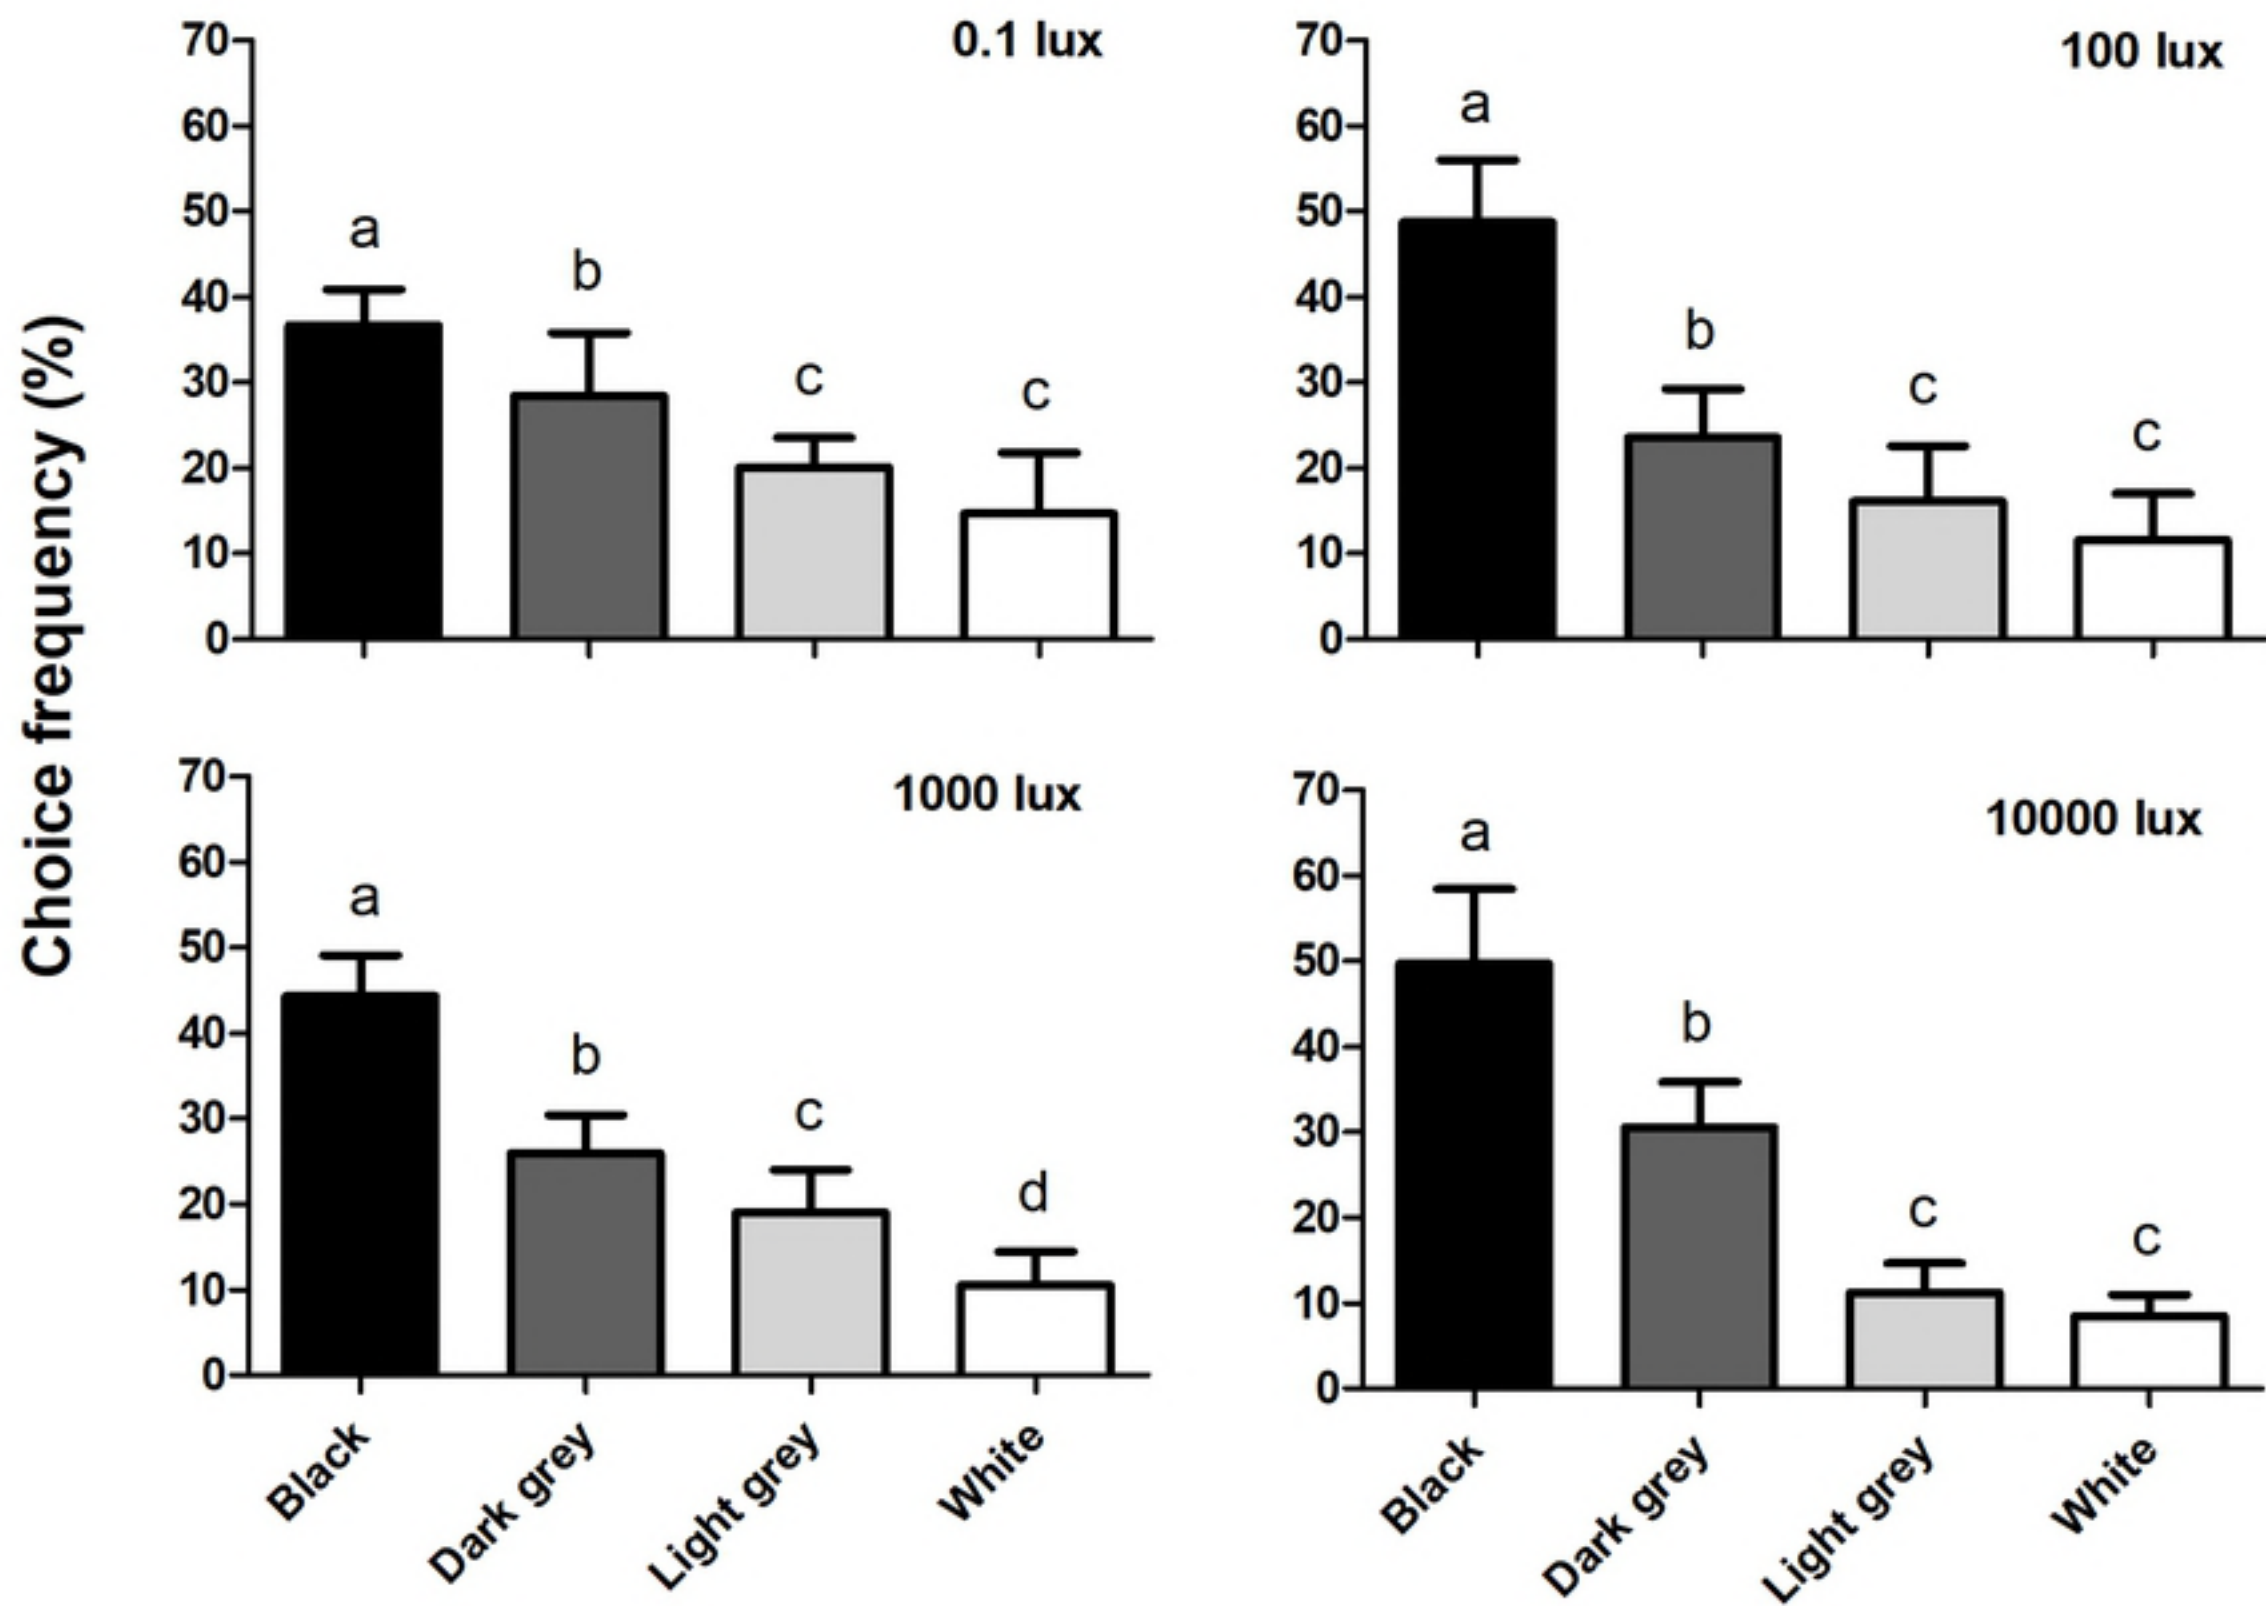

Fig. 4



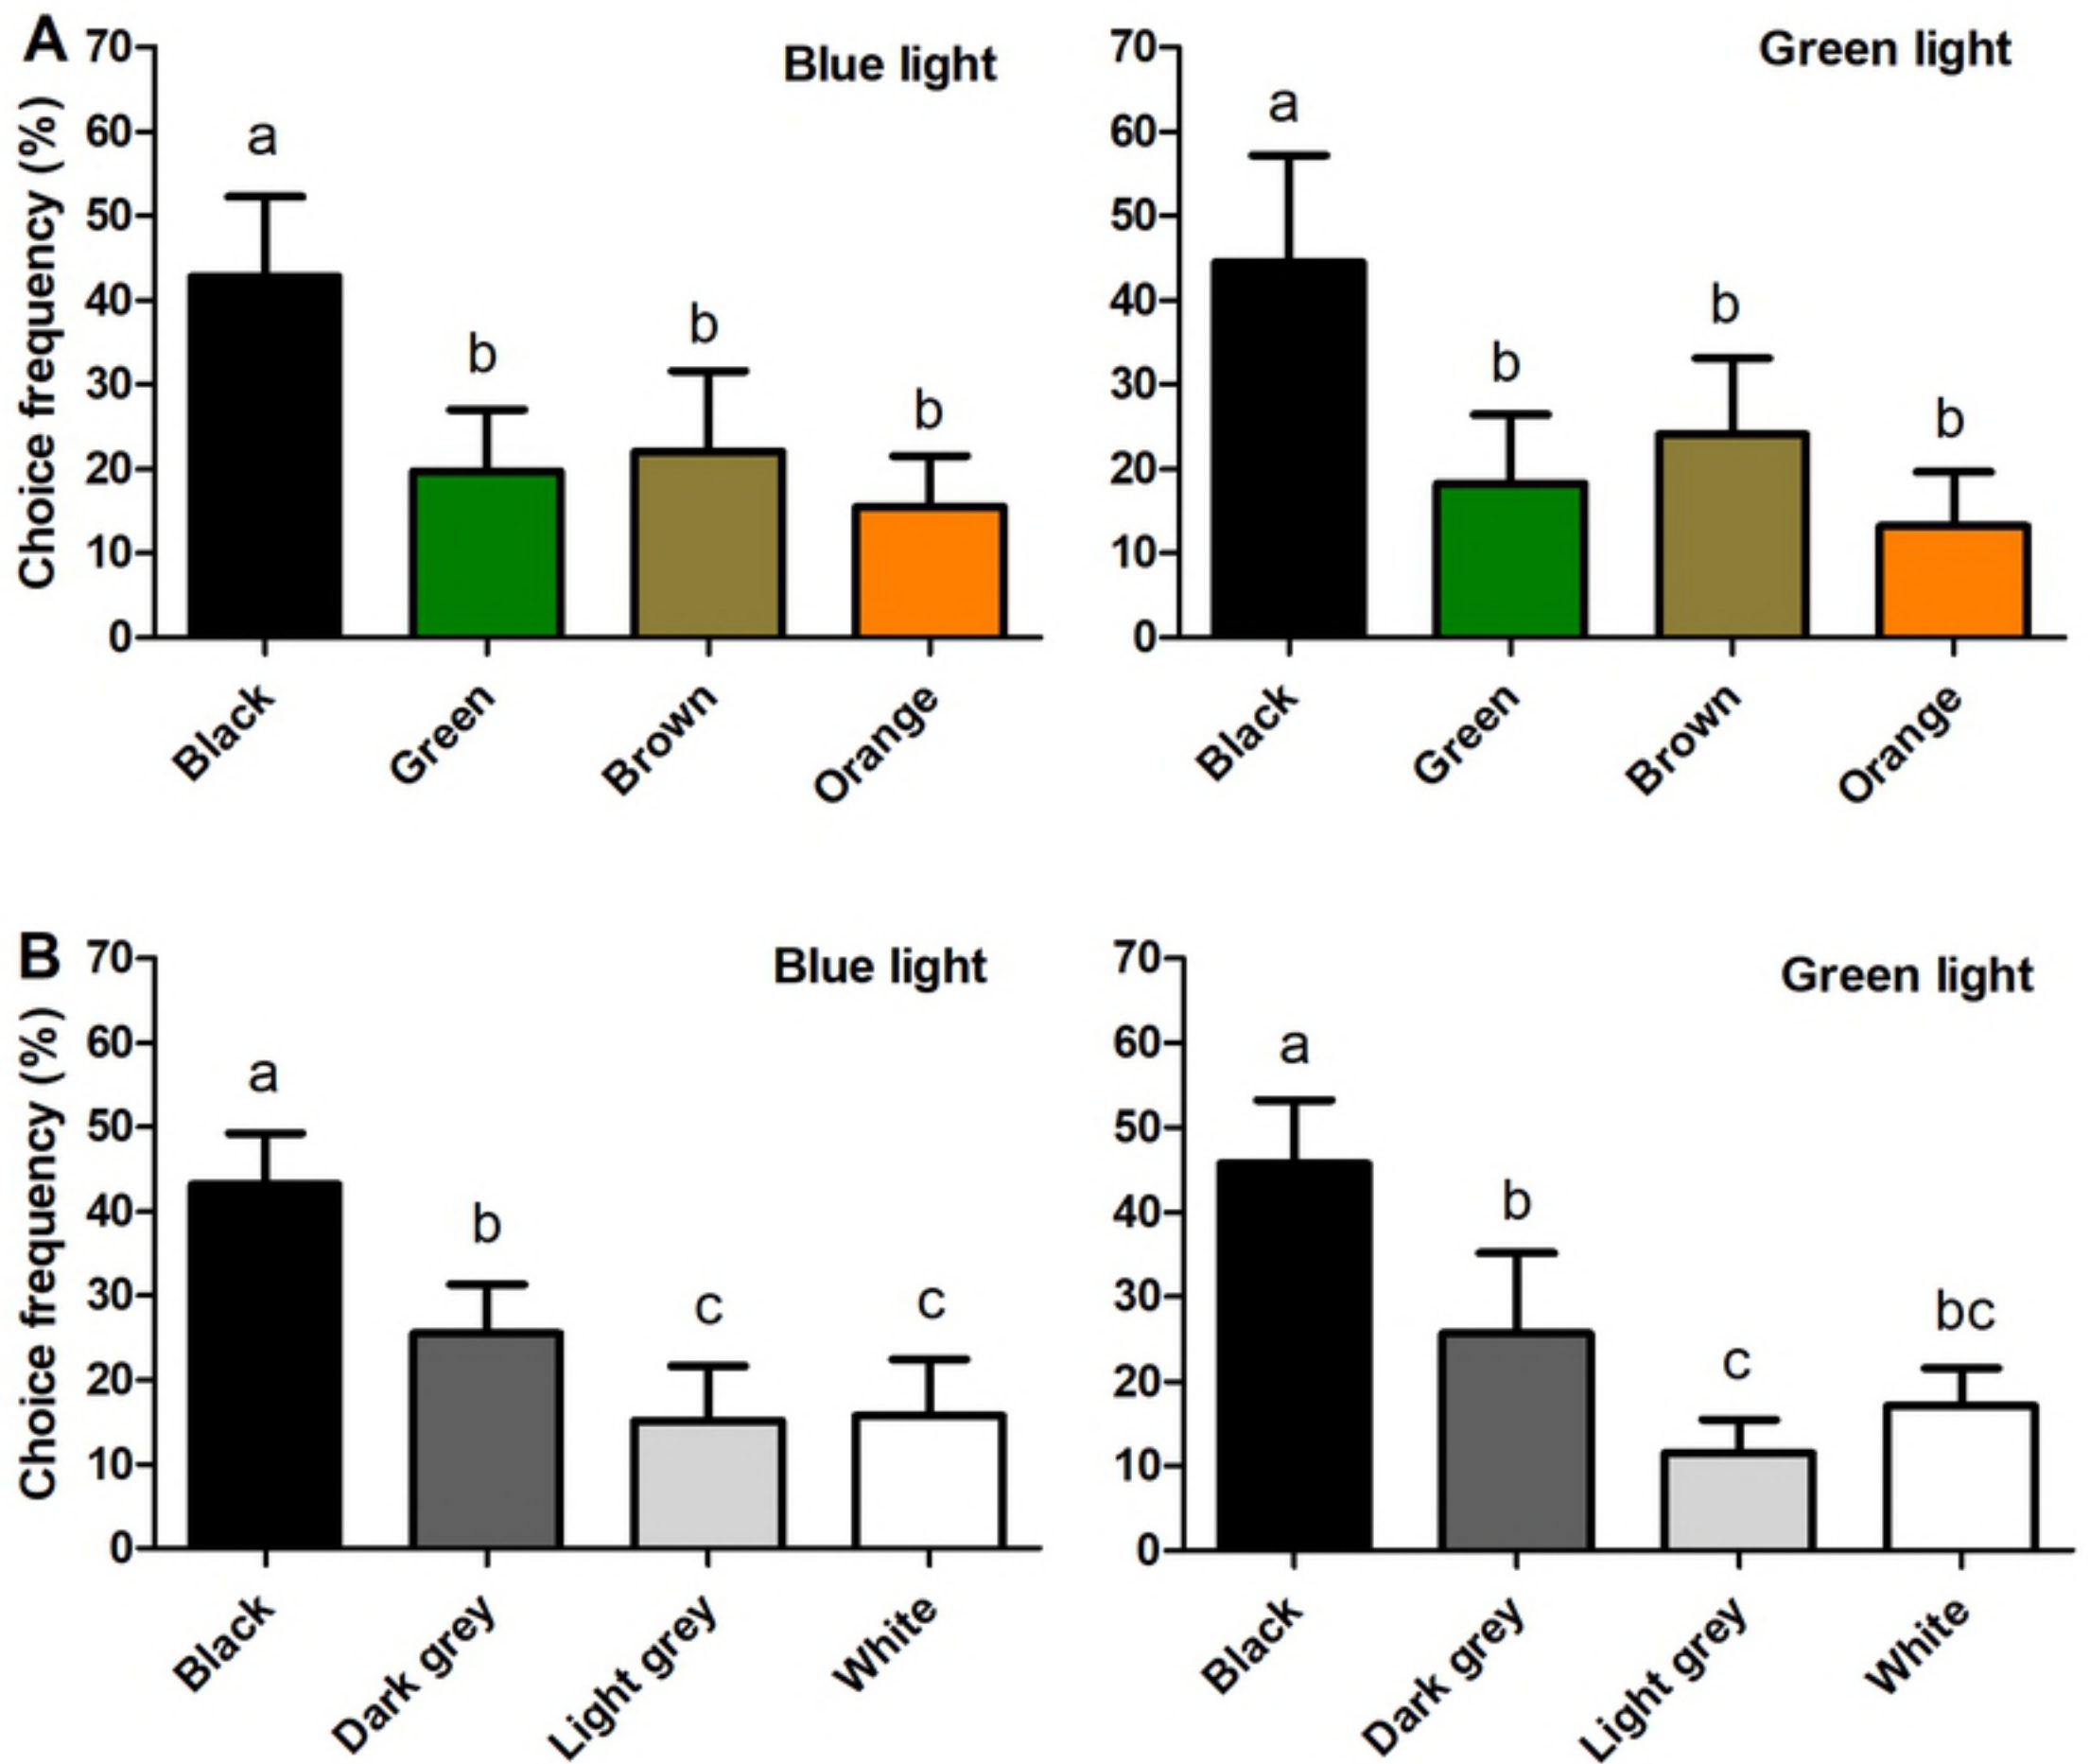

Fig. 5

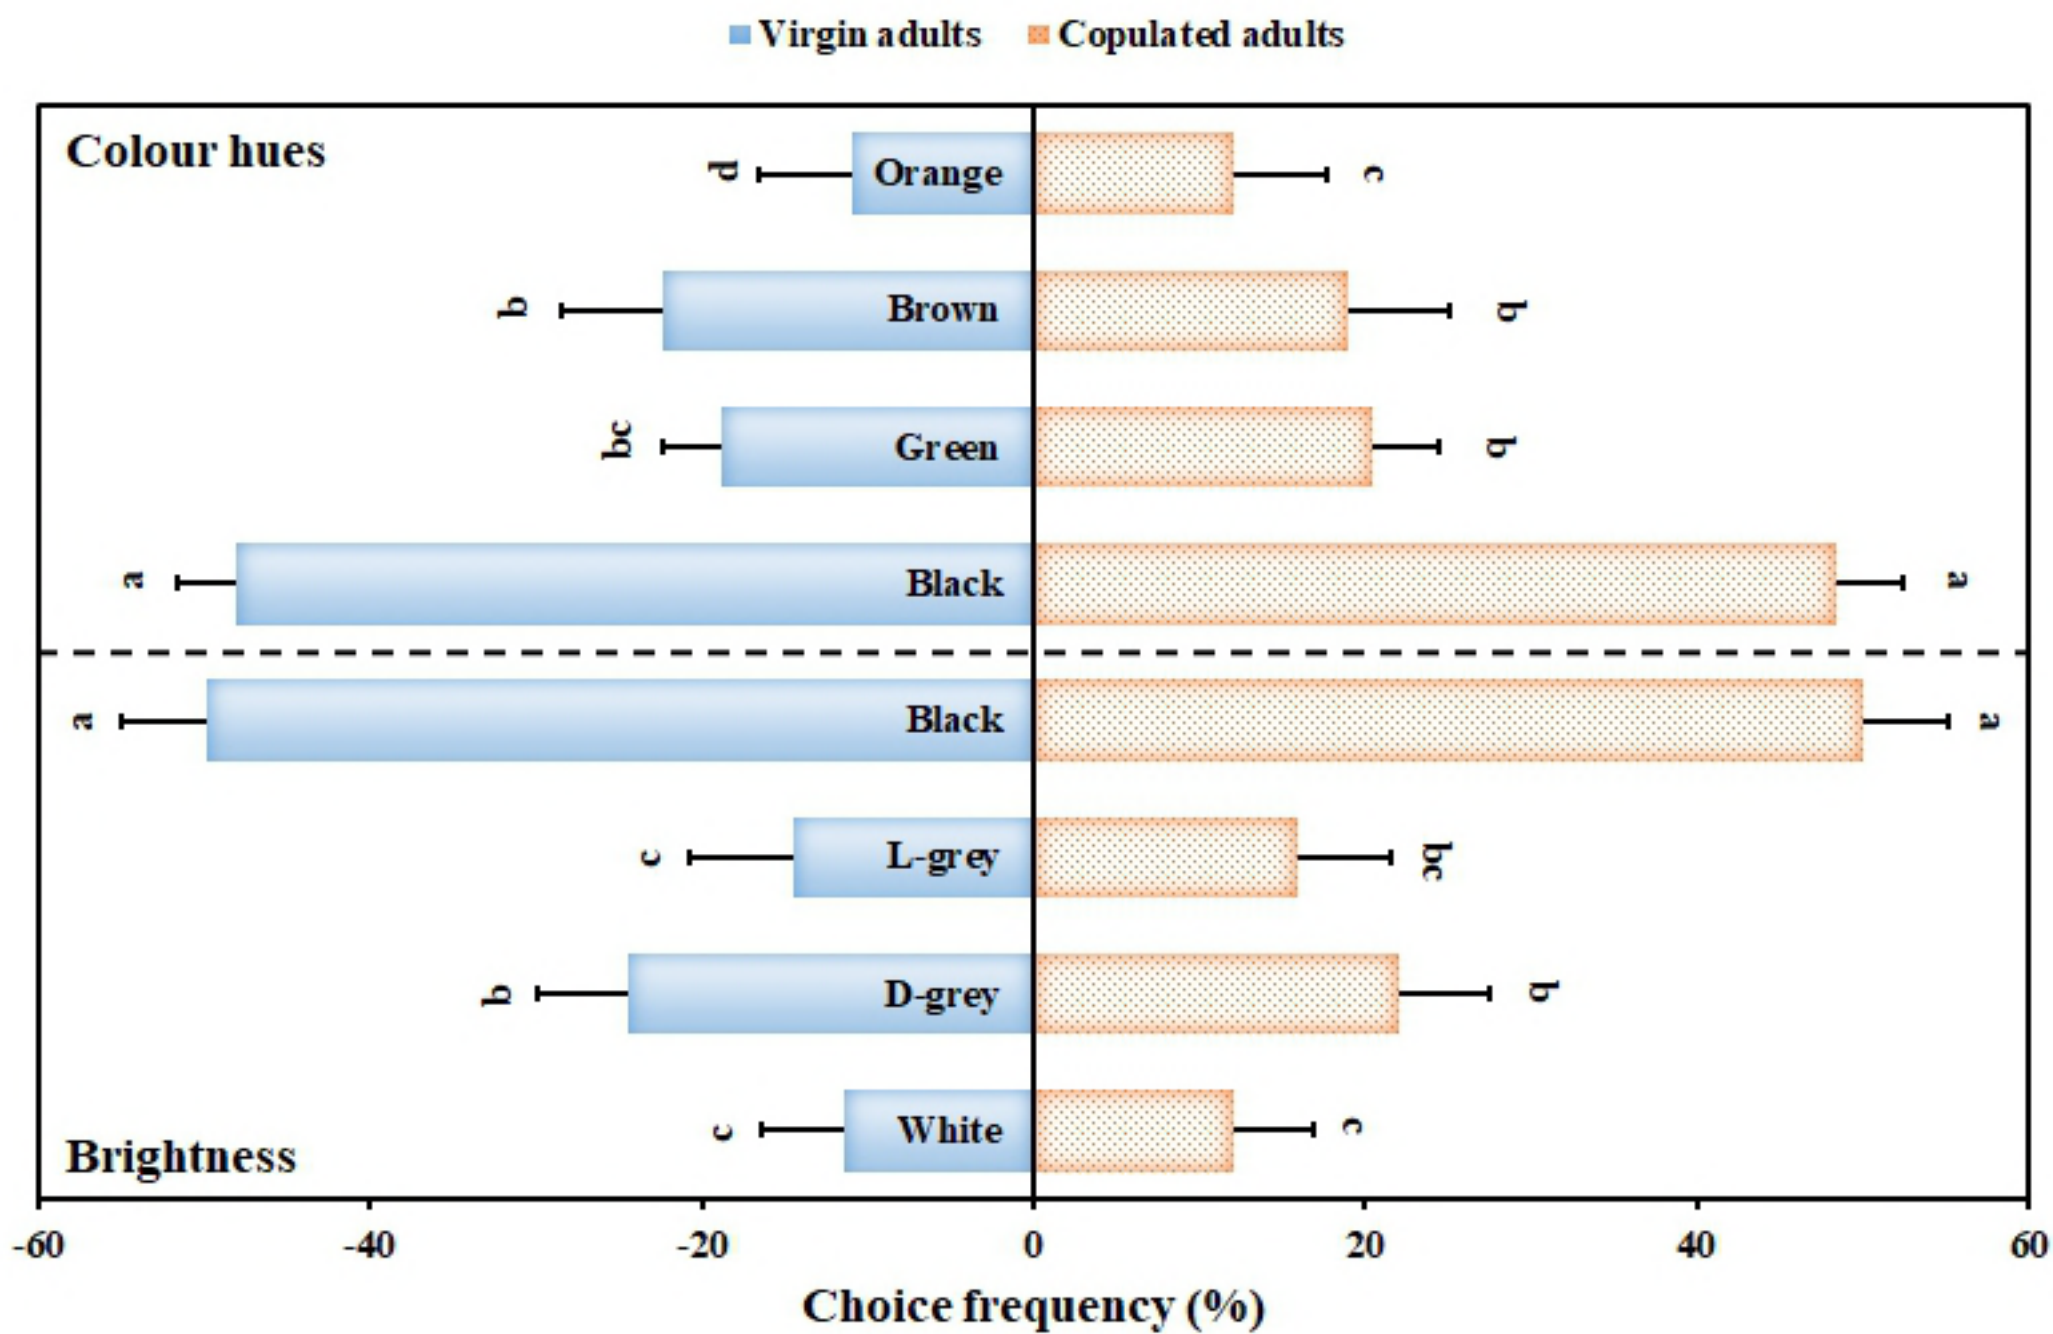

Fig. 6

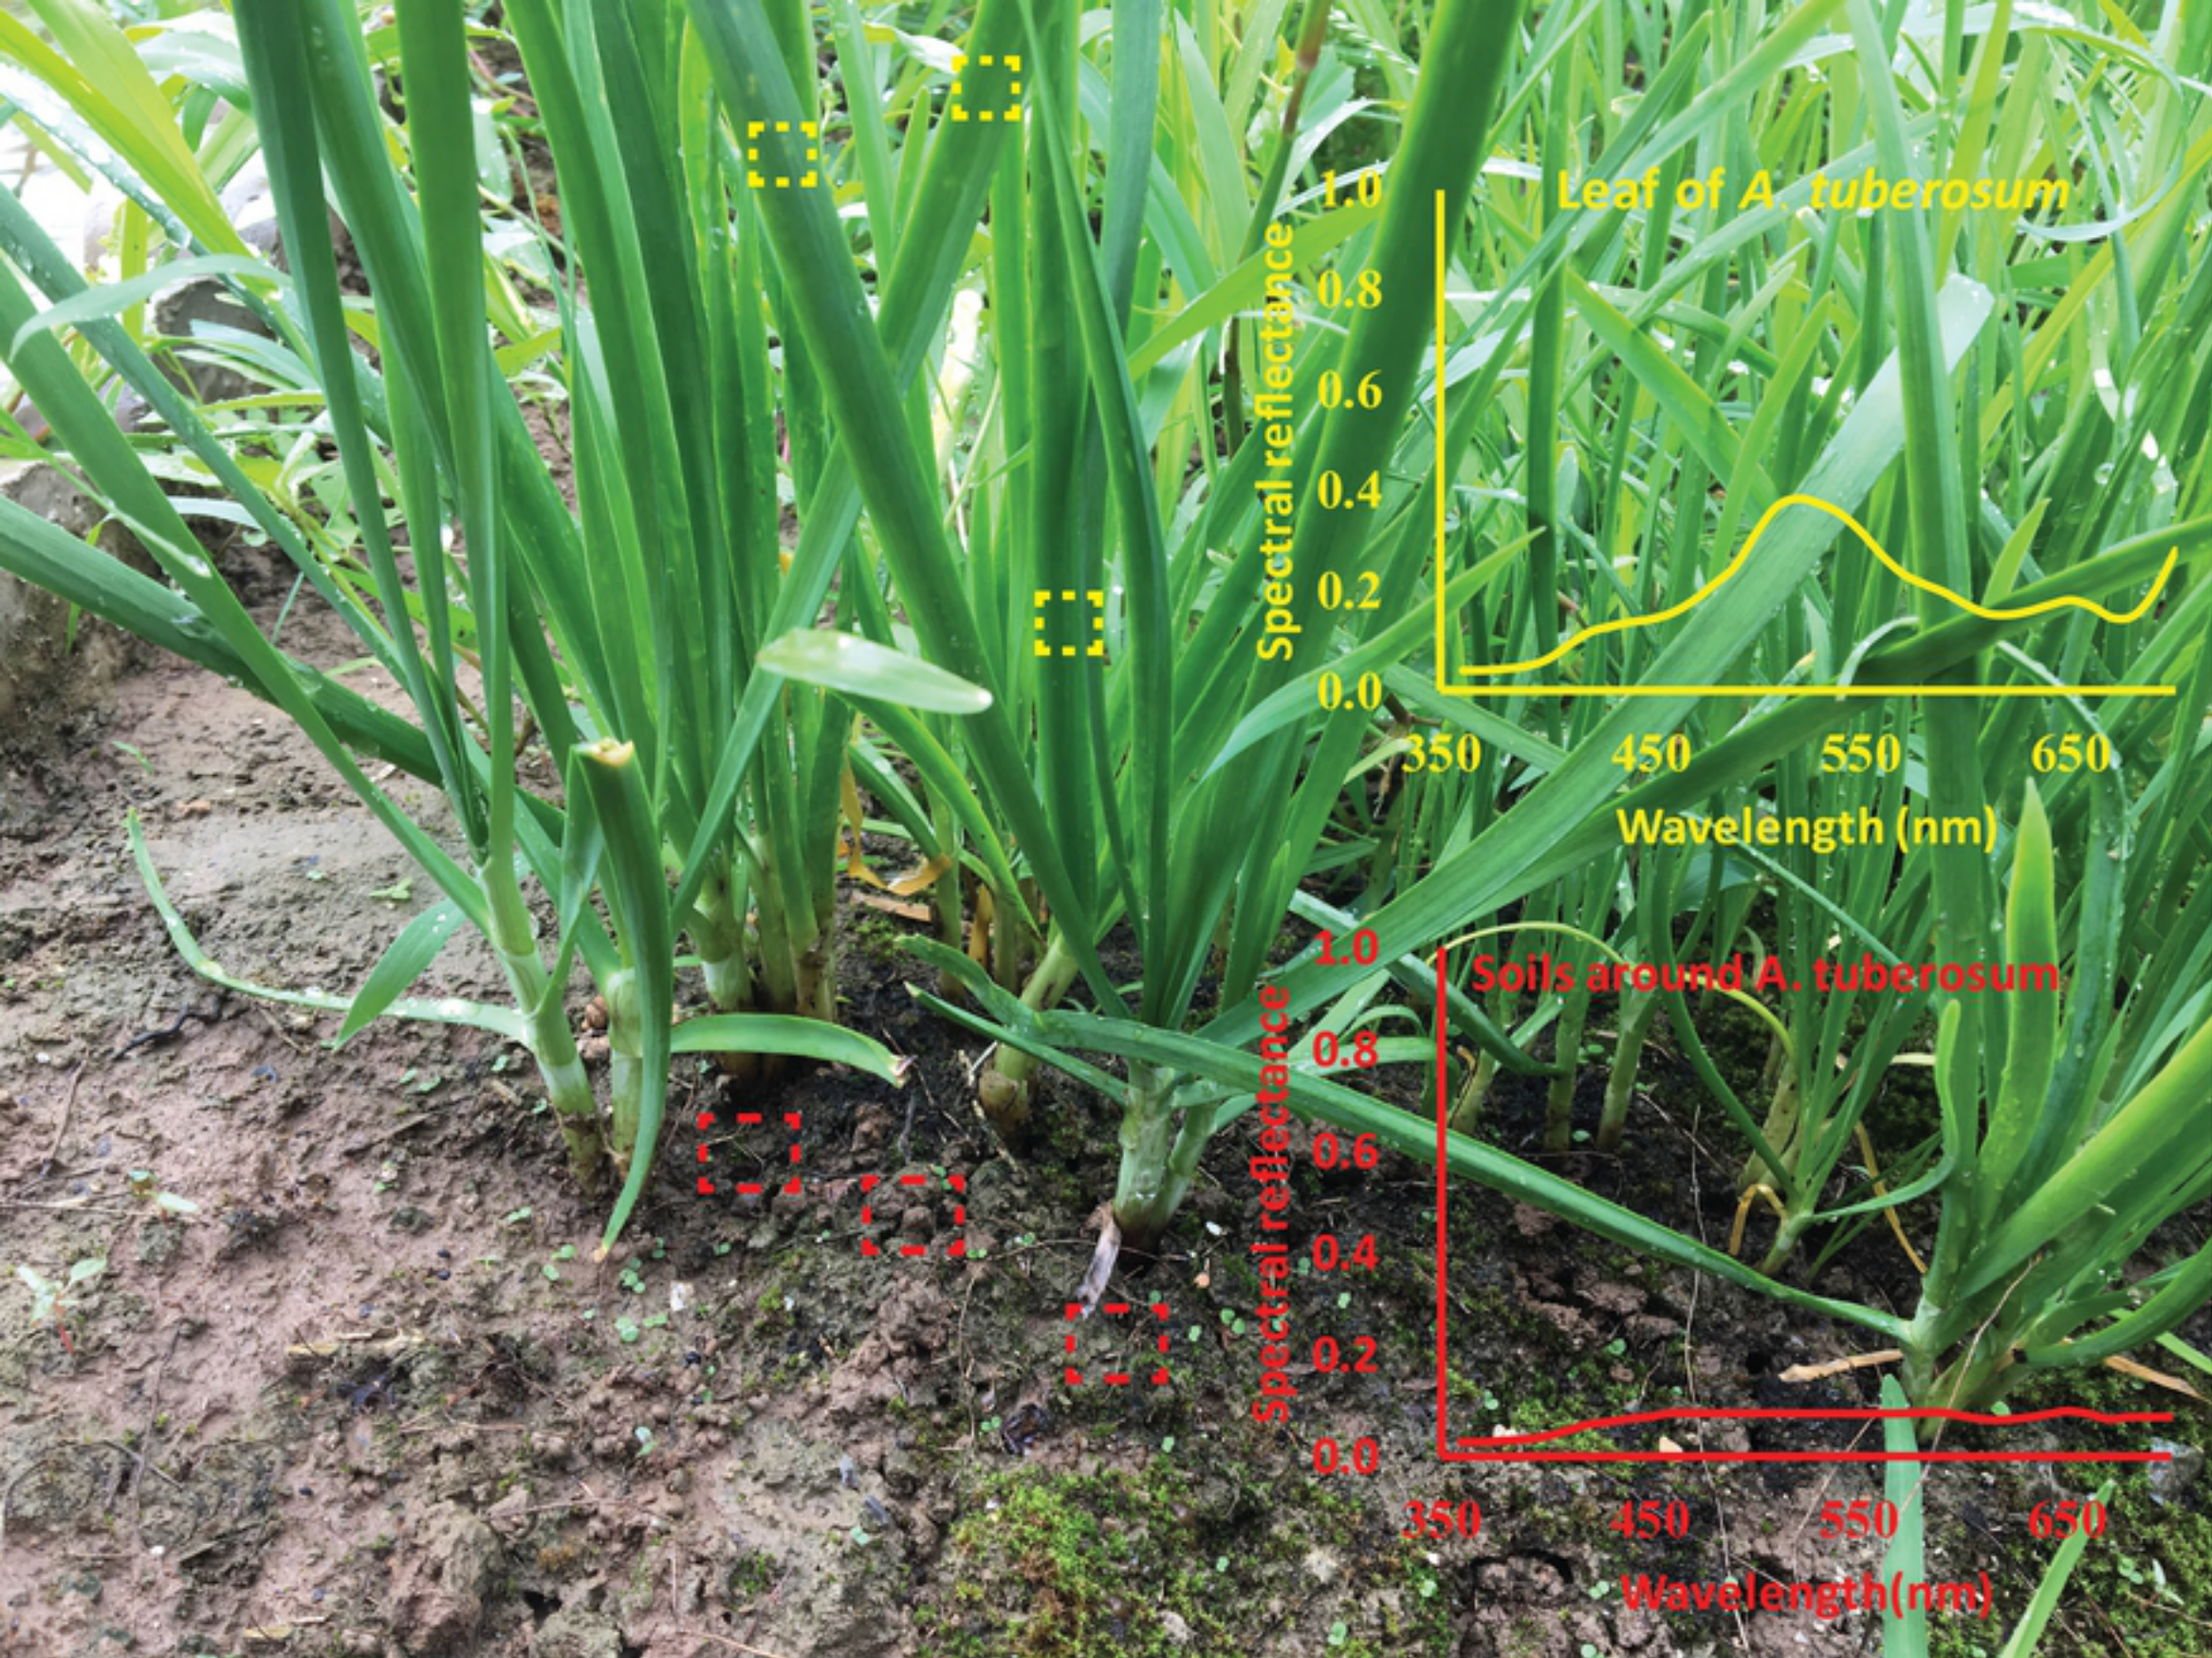

Fig. 7
